# Supplementary material for: Design and performance study of high efficiency/low efficiency roll-off/high CRI hybrid WOLEDs based on aggregation-induced emission materials as fluorescent emitters
Source: Royal Society of Chemistry journal article supplement (doi:10.1039/c9qm00539k), 2019-01-01
Supplement: c9qm00539k1.pdf [file c9qm00539k1.pdf]

**Design and Performance Study of High Efficiency/Low Efficiency Roll-off/High CRI Hybrid WOLEDs Based on Aggregation-Induced Emission Materials as Fluorescent Emitters**

*Zeng Xu<sup>1</sup>, Jiabao Gu<sup>1</sup>, Jian Huang<sup>1</sup>, Chengwei Lin<sup>1</sup>, Yuanzhao Li<sup>1</sup>, Dezhi Yang<sup>1</sup>, Xianfeng Qiao<sup>1</sup>, Anjun Qin<sup>1</sup>, Zujin Zhao<sup>1</sup>, Ben Zhong Tang<sup>1,2,\*</sup>, Dongge Ma<sup>1,\*</sup>*

Mr. Z. Xu, Mr. J. Gu, Mrs. J. Huang, Mr. C. Lin, Mr. Y. Li, Dr. D. Y, Dr. X. Qiao, Prof. A. Qin, Prof. Z. Zhao, Prof. B. Tang and Prof. D. Ma

<sup>1</sup>Center for Aggregation-Induced Emission, Institute of Polymer Optoelectronic Materials and Devices, State Key Laboratory of Luminescent Materials and Devices, South China University of Technology, Guangzhou, 510640, China.

E-mail: msdgm@scut.edu.cn

Prof. B. Z. Tang

<sup>2</sup>Department of Chemistry, Hong Kong Branch of Chinese National Engineering Research Center for Tissue Restoration and Reconstruction, The Hong Kong University of Science & Technology, Clear Water Bay, Kowloon, Hong Kong, China.

E-mail: tangbenz@ust.hk

## 1. EL spectra of monochromatic devices

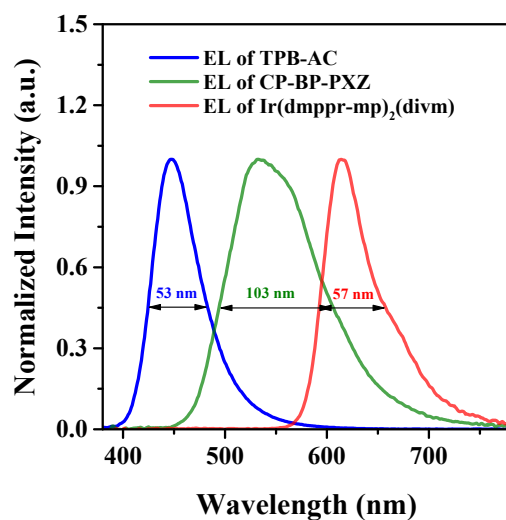

**Figure S1.** EL spectra of TPB-AC, CP-BP-PXZ, and Ir(dmprr-mp)<sub>2</sub>(divm) based monochromatic devices.

## 2. Current efficiency–luminance characteristics of devices W1, W2, and W3

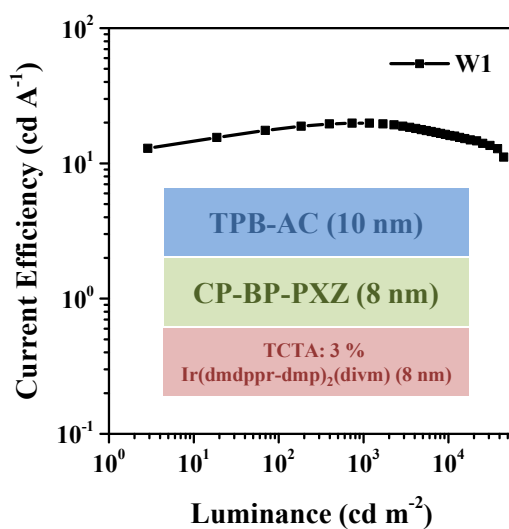

**Figure S2.** Current efficiency–luminance characteristic of device W1 with the configuration of ITO/HAT-CN (5 nm)/TAPC (50 nm)/TCTA (5 nm)/TCTA: 3 wt% Ir(dmprr-mp)<sub>2</sub>(divm) (8 nm)/CP-BP-PXZ (8 nm)/TPB-AC (10 nm)/TmPyPB (40 nm)/LiF (1 nm)/Al (120 nm). Inset: the structure of emitting layer in device W1.

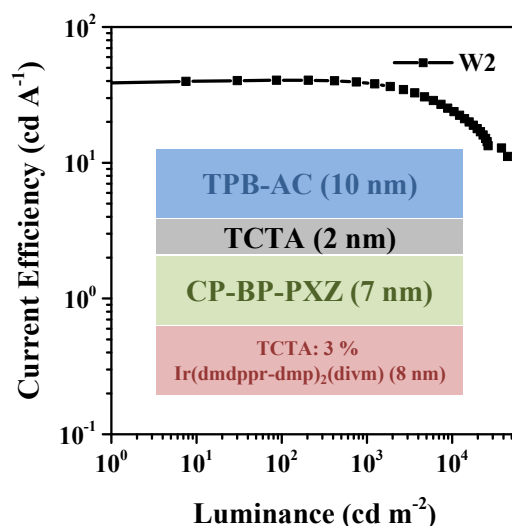

**Figure S3.** Current efficiency–luminance characteristic of device W2 with the configuration of ITO/HAT-CN (5 nm)/TAPC (50 nm)/TCTA (5 nm)/TCTA: 3 wt% Ir(dmp<sub>ppr</sub>-mp)<sub>2</sub>(divm) (8 nm)/CP-BP-PXZ (7 nm)/TCTA (2 nm)/TPB-AC (10 nm)/TmPyPB (40 nm)/LiF (1 nm)/Al (120 nm). Inset: the structure of emitting layer in device W2.

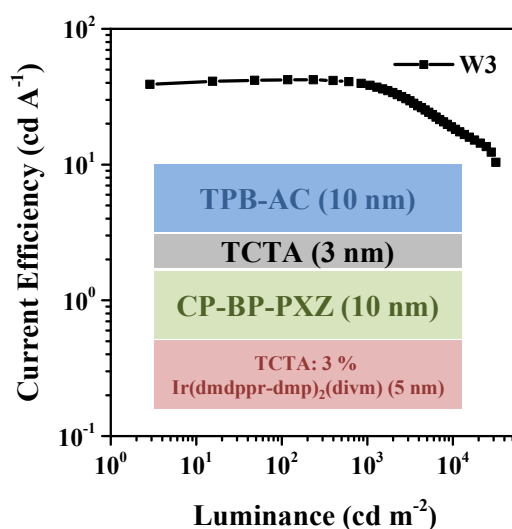

**Figure S4.** Current efficiency–luminance characteristic of device W3 with the configuration of ITO/HAT-CN (5 nm)/TAPC (50 nm)/TCTA (5 nm)/TCTA: 3 wt% Ir(dmp<sub>ppr</sub>-mp)<sub>2</sub>(divm) (5 nm)/CP-BP-PXZ (10 nm)/TCTA (3 nm)/TPB-AC (10 nm)/TmPyPB (40 nm)/LiF (1 nm)/Al (120 nm).

nm)/TmPyPB (40 nm)/LiF (1 nm)/Al (120 nm). Inset: the structure of emitting layer in device W3.

### 3. EL spectra of devices C1-C3, and W2

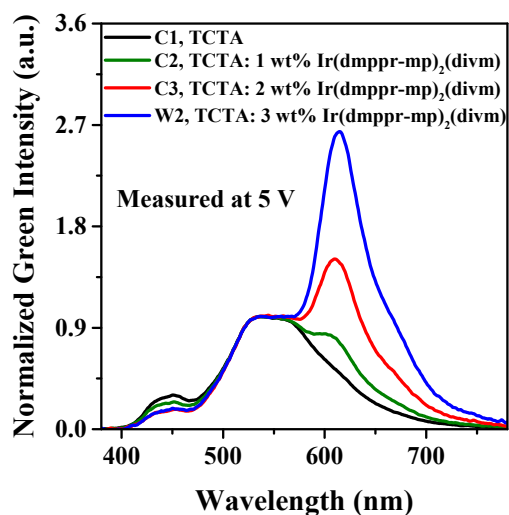

**Figure S5.** EL spectra of devices C1-C3, and W2 measured at 4 V. Device structure is ITO/HAT-CN (5 nm)/TAPC (50 nm)/TCTA (5 nm)/TCTA: y wt% Ir(dmprr-mp)<sub>2</sub>(divm) (8 nm)/CP-BP-PXZ (7 nm)/TCTA (2 nm)/TPB-AC (10 nm)/TmPyPB (40 nm)/LiF (1 nm)/Al (120 nm), where y = 0 for device C1, y = 1 for device C2, y = 2 for device C3, y = 3 for device W2.

#### 4. PL spectra of film 1-4

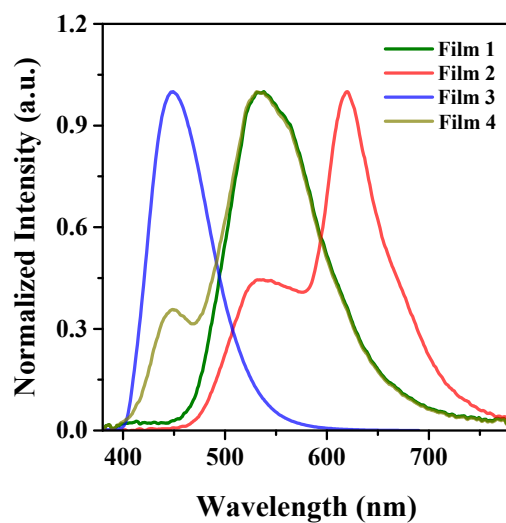

**Figure S6.** PL spectra of films 1-4. Structures of film 1: substrate/TCTA (8 nm)/CP-BP-PXZ (7 nm), film 2: substrate/TCTA : 3 wt% Ir(dmprr-mp)<sub>2</sub>(divm) (8 nm)/CP-BP-PXZ (7 nm), film 3: substrate/TCTA (2 nm)/TPB-AC (10 nm), film 4: substrate/CP-BP-PXZ (7 nm)/TCTA (2 nm)/TPB-AC (10 nm).
